# Supplementary material for: Support service utilization and out-of-pocket payments for health services in a population-based sample of adults with neurological conditions
Source: PLoS One. 2018 Feb 23;13(2):e0192911. doi: 10.1371/journal.pone.0192911 (PMC5825050; doi:10.1371/journal.pone.0192911)
Supplement: S1 Table — (DOCX) [file pone.0192911.s001.docx]

**SUPPORTING INFORMATION**

**Support service utilization and out-of-pocket payments for health services in a population-based sample of adults with neurological conditions**

Adebimpe O. Obembe, PhD 1,2 , Charlie H. Goldsmith, PhD 4,5,, Lisa A. Simpson, MSc 2,3, Brodie M. Sakakibara, PhD 1,2, Janice J. Eng, PhD *1,2,

1Department of Physical Therapy, University of British Columbia, Vancouver, Canada

2Rehabilitation Research Program, GF Strong Rehab Centre, Vancouver Coastal Health Research Institute, Vancouver, Canada

3Graduate Program in Rehabilitation Sciences, University of British Columbia, Vancouver, Canada

4Adjunct Professor, Faculty of Health Sciences, Simon Fraser University, Burnaby, Canada
5Adjunct Professor, Department of Occupational Science and Occupational Therapy, Faculty of Medicine, The University of British Columbia, Vancouver, Canada

**S1 Table. Logistic regression for formal assistance use and socio-demographic covariates (age, sex and income)**

| **OR (95% CI)** | **Stroke**  (N=176452) | **Parkinson's disease**  (N=40753) | **Traumatic Brain Injury**  (N=61929) | **Spinal Cord Injury**  (N=50967) | **Multiple sclerosis**  (N=83957) | **Alzheimer's and dementias**  (N=45712) |
| --- | --- | --- | --- | --- | --- | --- |
| ***Personal care*** |  |  |  |  |  |  |
| Age | 3.09(1.69, 5.66)* | 2.52(1.44, 4.42)* | 2.36(1.31, 4.26)* | 2.71(1.55, 4.72)* | 2.67(1.51, 4.72)* | 2.24(1.27, 3.97)* |
| Sex | 1.61(1.00, 2.00)† | 1.72(1.06, 2.78) † | 1.62(1.00, 2.61) † | 1.61(0.99, 2.63) | 1.63(1.02, 2.63) † | 1.57(0.97, 2.54) |
| Income | 0.53(0.34, 0.82) ‡ | 0.53(0.33, 0.84) ‡ | 0.53(0.33, 0.85) ‡ | 0.55(0.35, 0.87) ‡ | 0.55(0.35, 0.87) ‡ | 0.52(0.33, 0.81) ‡ |
| ***Medical care*** |  |  |  |  |  |  |
| Age | 2.94(1.66, 5.19)* | 2.34(1.29, 4.25)* | 2.16(1.25, 3.73)* | 2.54(1.43, 4.50)* | 2.46(1.35, 4.48)* | 1.89(1.05, 3.41)* |
| Sex | 1.26(0.78, 2.04) | 1.29(0.79, 2.11) | 1.26(0.77, 2.06) | 1.30(0.78, 2.16) | 1.25(0.75, 2.08) | 1.21(0.74, 2.00) |
| Income | 0.54(0.32, 0.93) ‡ | 0.57(0.33, 0.97) ‡ | 0.56(0.32, 0.99) ‡ | 0.57(0.33, 0.98) ‡ | 0.57(0.33, 0.99) ‡ | 0.54(0.31, 0.94) ‡ |
| ***Managing care*** |  |  |  |  |  |  |
| Age | 0.53(0.21, 1.34) | 0.35(0.12, 1.00) § | 0.68(0.30, 1.54) | 0.36(0.13, 1.04) | 0.34(0.11, 1.07) | 0.33(0.11, 1.04) |
| Sex | 2.32(0.84, 6.46) | 2.54(0.90, 7.22) | 2.56(0.90, 7.25) | 2.24(0.77, 6.49) | 2.63(0.86, 8.03) | 2.35(0.81, 6.83) |
| Income | 0.44(0.16, 1.27) | 0.44(0.15, 1.30) | 0.53(0.19, 1.44) | 0.45(0.15, 1.38) | 0.46(0.16, 1.35) | 0.44(0.15, 1.33) |
| ***Transportation*** |  |  |  |  |  |  |
| Age | 0.90(0.46, 1.74) | 0.79(0.36, 1.74) | 0.97(0.54, 1.75) | 0.80(0.36, 1.75) | 0.75(0.32, 1.73) | 0.74(0.33, 1.68) |
| Sex | 1.38(0.63, 3.02) | 1.38(0.61, 3.11) | 1.41(0.64, 3.09) | 1.39(0.63, 3.09) | 1.44(0.62, 3.34) | 1.37(0.61, 3.07) |
| Income | 0.57(0.25, 1.28) | 0.58(0.25, 1.33) | 0.61(0.28, 1.31) | 0.58(0.26, 1.32) | 0.58(0.26, 1.31) | 0.57(0.25, 1.33) |
| ***Emotional support*** |  |  |  |  |  |  |
| Age | 1.05(0.50, 2.22) | 0.88(0.36, 2.17) | 1.21(0.62, 2.38) | 0.88(0.38, 2.05) | 0.84(0.33, 2.14) | 0.81(0.33, 2.03) |
| Sex | 1.42(0.64, 3.12) | 1.46(0.63, 3.34) | 1.46(0.65, 3.27) | 1.37(0.61, 3.09) | 1.51(0.63, 3.60) | 1.39(0.61, 3.17) |
| Income | 0.67(0.28, 1.59) | 0.68(0.28, 1.64) | 0.73(0.33, 1.63) | 0.69(0.29, 1.67) | 0.69(0.29, 1.63) | 0.67(0.28, 1.64) |
| ***Household activities*** |  |  |  |  |  |  |
| Age | 1.72(1.11, 2.68)* | 1.44(0.90, 2.30) | 1.63(1.04, 2.54)* | 1.56(0.98, 2.48) | 1.51(0.93, 2.43) | 1.44(0.89, 2.33) |
| Sex | 1.50(0.90, 1.10) | 1.52(0.90, 2.60) | 1.50(0.90, 2.51) | 1.54(0.92, 2.60) | 1.48(0.88, 2.49) | 1.48(0.88, 2.50) |
| Income | 0.58(0.33, 1.03) | 0.71(0.44, 1.14) | 0.73(0.45, 1.20) | 0.71(0.44, 1.15) | 0.72(0.45, 1.15) | 0.71(0.44, 1.15) |

*Significantly associated with higher odds for people younger than 60 years

†Significantly associated with higher odds for women

‡Significantly associated with lower odds for people with lower income

§Significantly associated with lower odds for people younger than 60 years
